# Supplementary material
Source: PubMed Central journal article supplement (PMC3601775)
Supplement: NIHMS378793-supplement-01.pdf [file NIHMS378793-supplement-01.pdf]

# **The structures of three human metabolites of the algal hepatotoxin okadaic acid**

*Li Liu, Fujiang Guo, Sheila Crain, Michael A. Quilliam, Xiaotang Wang and Kathleen S. Rein*

- S1.  $^1\text{H}$  NMR of metabolites 1 and 2.
- S2. COSYs of metabolites 1 and 2 from 1.0-2.3 ppm and 3.2-4.3 ppm of  $^1\text{H}$  NMR
- S3. TOCSYs of metabolites 1 and 2 from 0.7-2.2 ppm and 3.2-4.3 ppm of  $^1\text{H}$  NMR
- S4. HSQCs of metabolites 1 and 2 from 55-85 ppm of  $^{13}\text{C}$  NMR and 3.0-5.0 ppm of  $^1\text{H}$  NMR
- S5. HSQCs of metabolite 1 and 2 from 110-150 ppm of  $^{13}\text{C}$  NMR and 3.5-5.5 ppm of  $^1\text{H}$  NMR
- S6. Table of  $^1\text{H}$  and  $^{13}\text{C}$  chemical shifts for metabolites 1 and 2 and COSY and TOCSY correlations for metabolite 1.
- S7. HRESIMS of metabolite 1
- S8. HRESIMS of metabolite 2
- S9. HRESIMS of metabolite 4

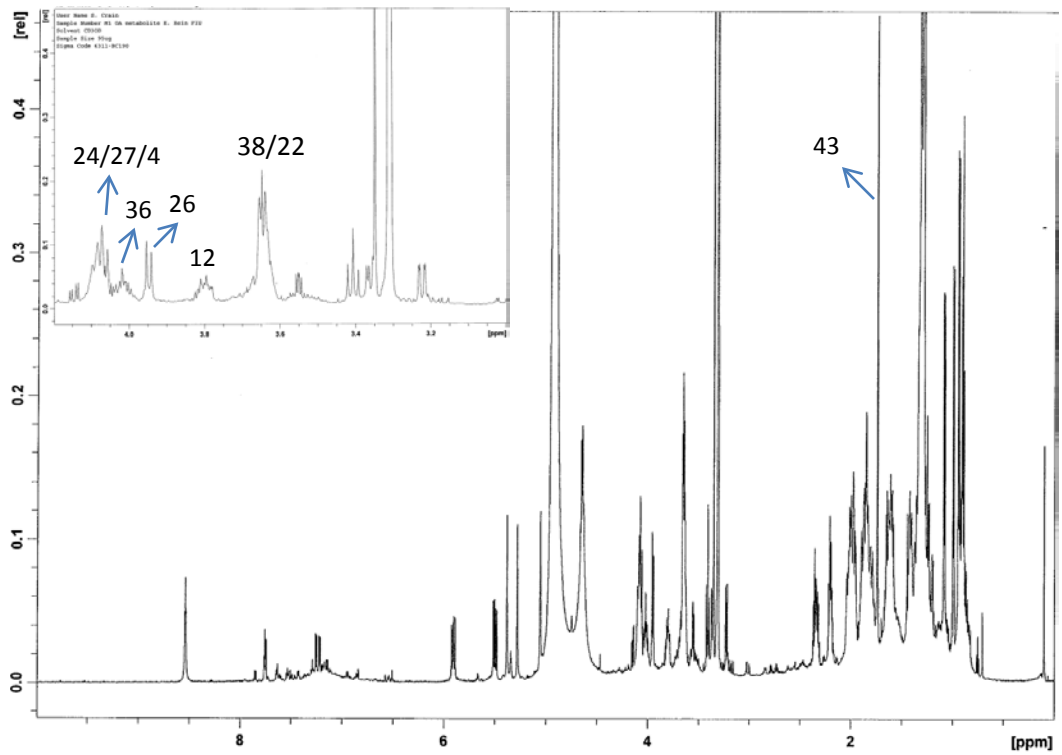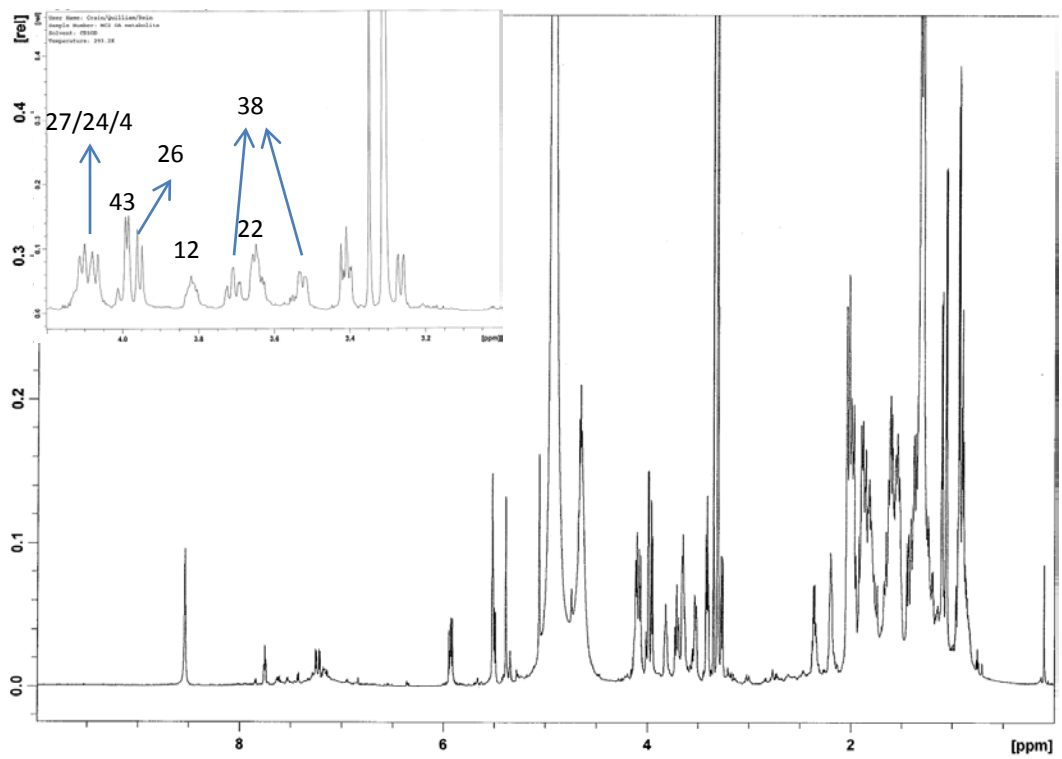

S1. <sup>1</sup>H NMR of metabolites 1 (top) and 2 (bottom)

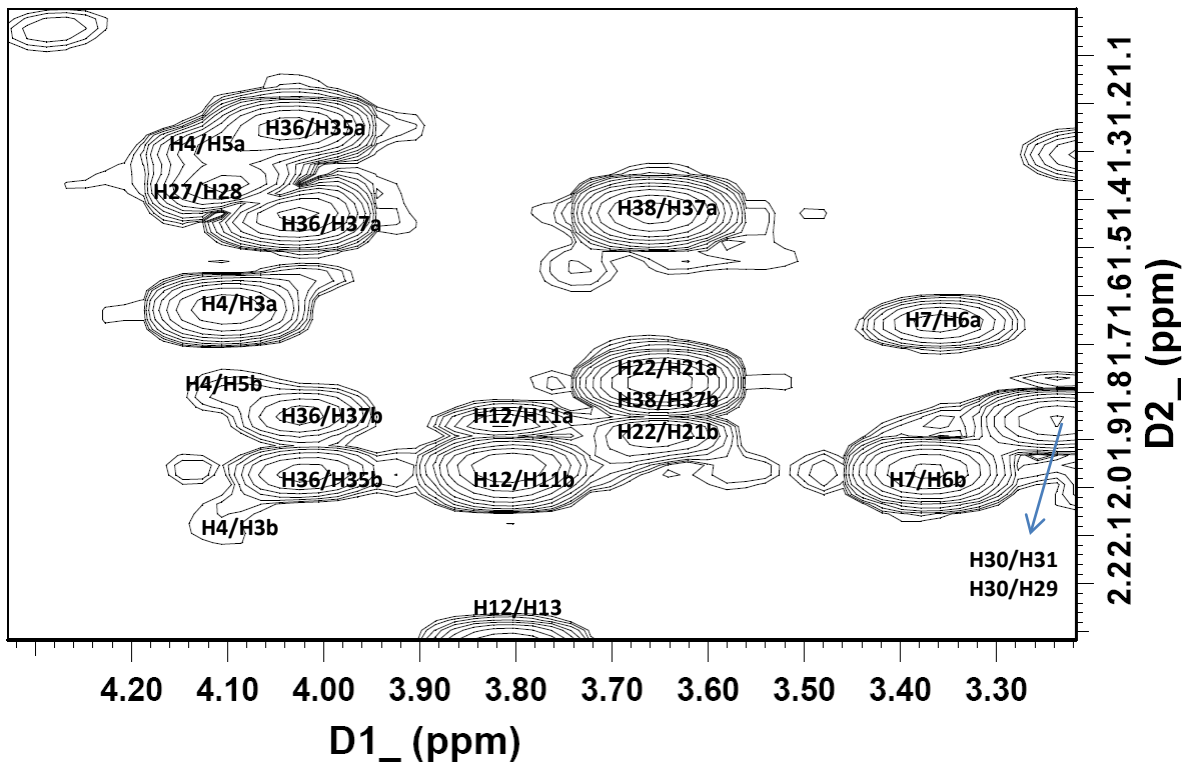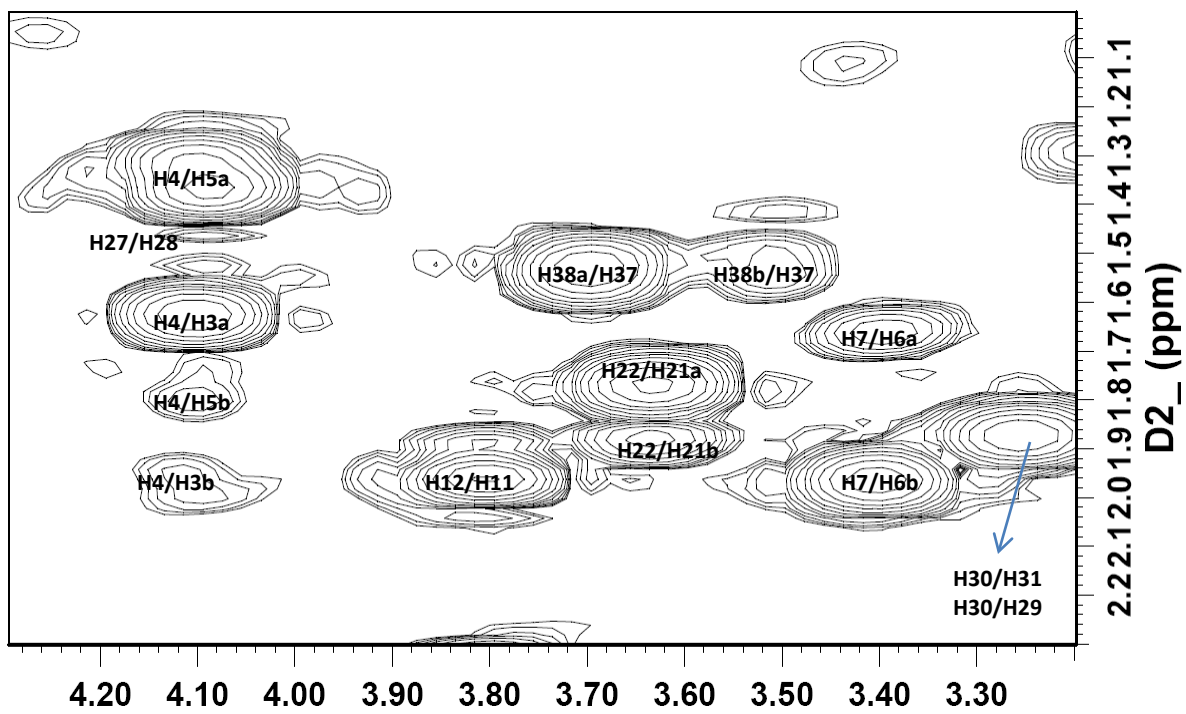

S2. COSY of metabolites1 (top) and 2 (bottom) from 1.0-2.3 ppm and 3.2-4.3 ppm of  $^1\text{H}$  NMR

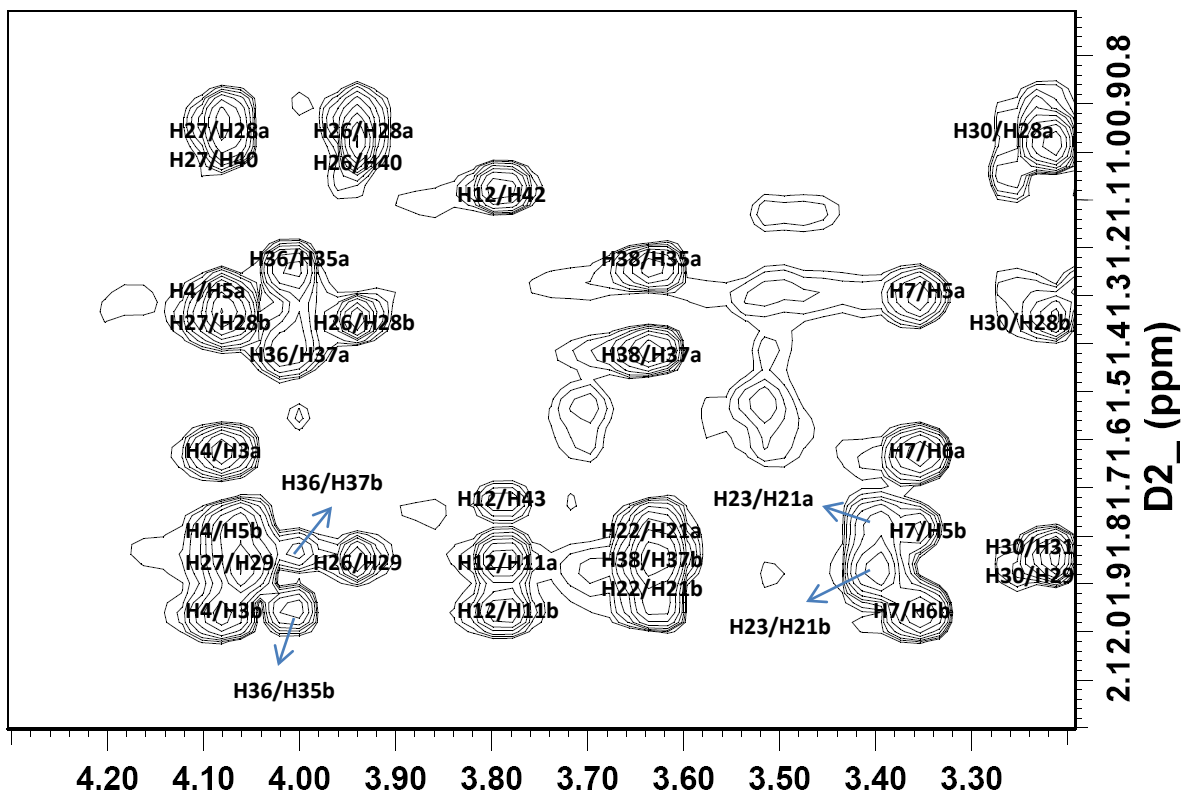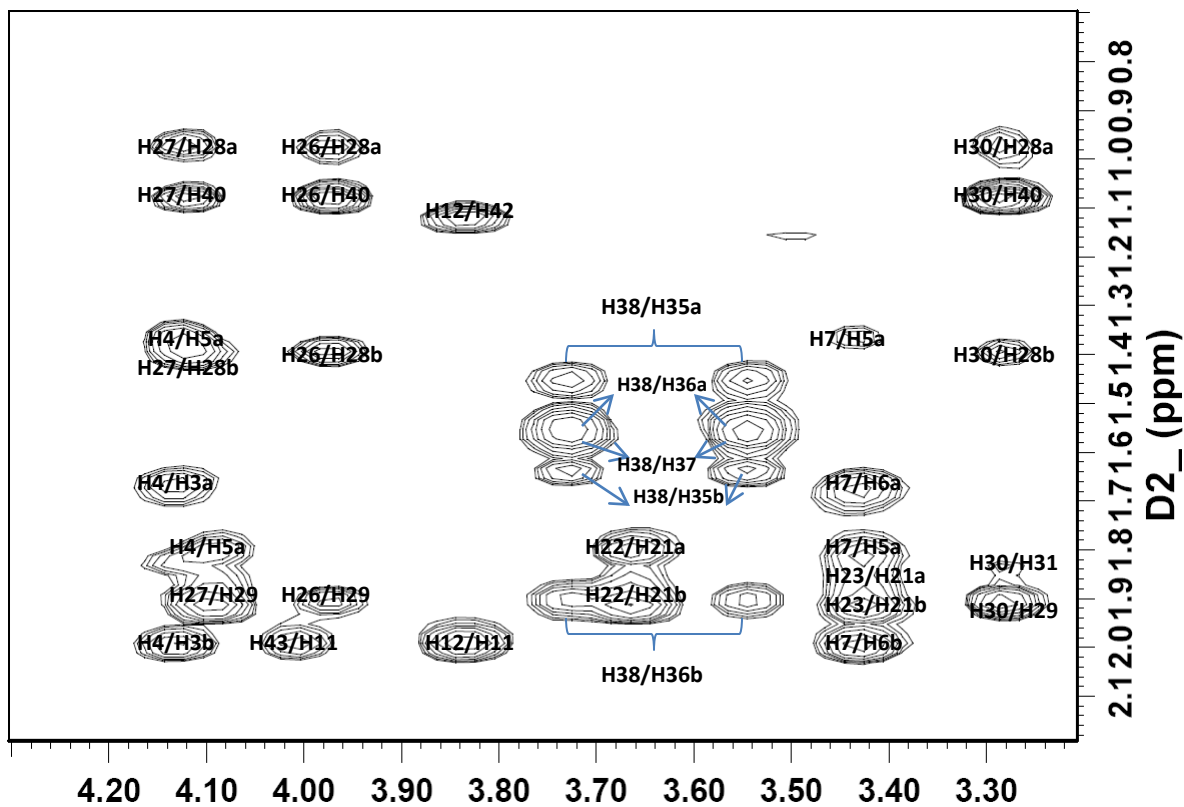

S3. TOCSY of metabolites 1 (top) and 2 (bottom) from 0.7-2.2 ppm and 3.2-4.3 ppm of <sup>1</sup>H NMR

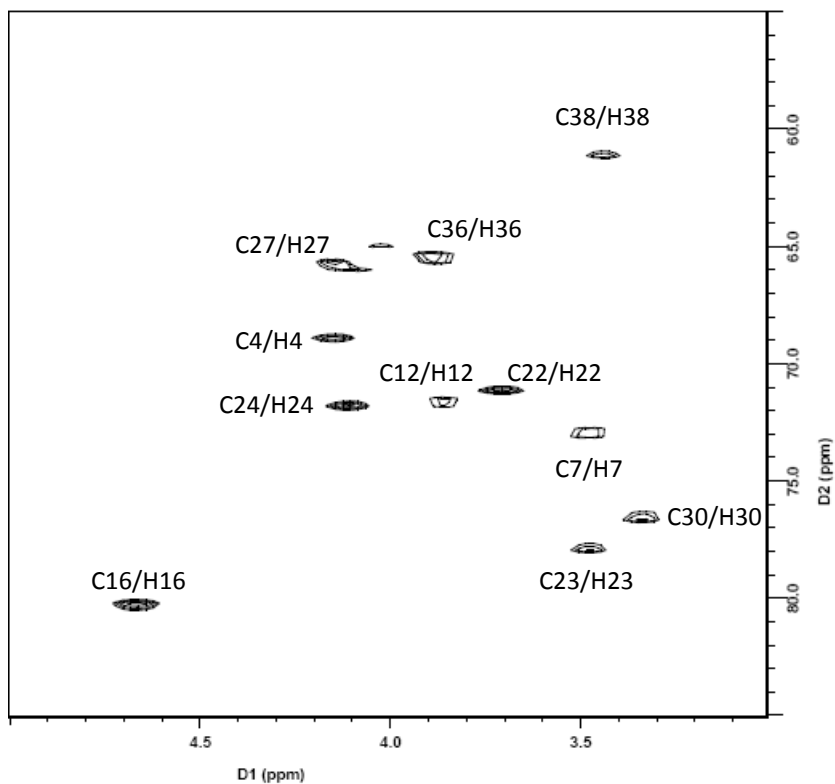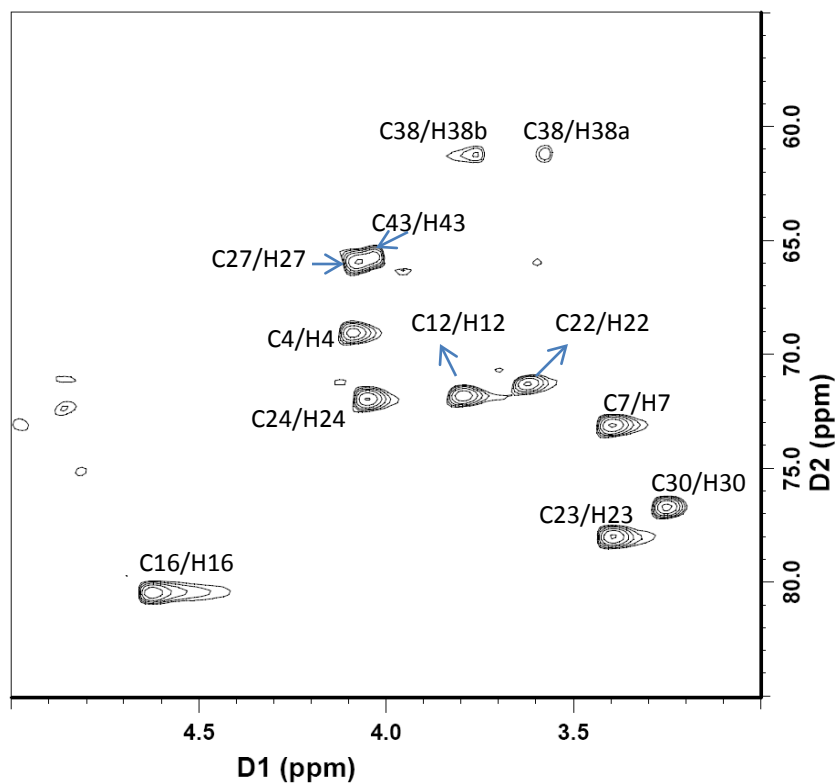

S4. HSQC of metabolite 1 (top) and 2 (bottom) from 55-85 ppm of  $^{13}\text{C}$  NMR and 3.0-5.0 ppm of  $^1\text{H}$  NMR

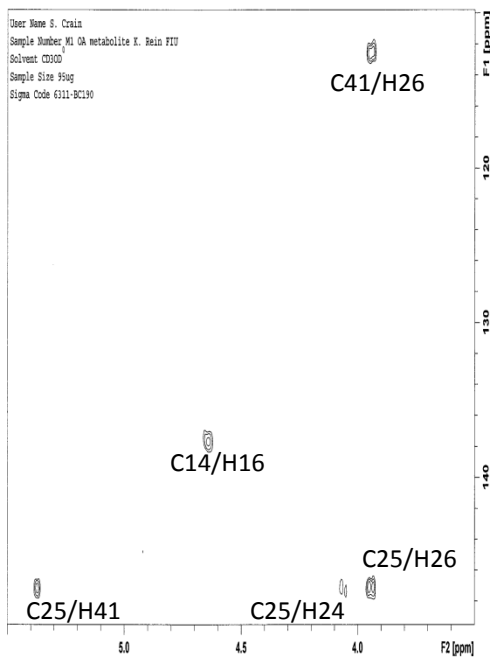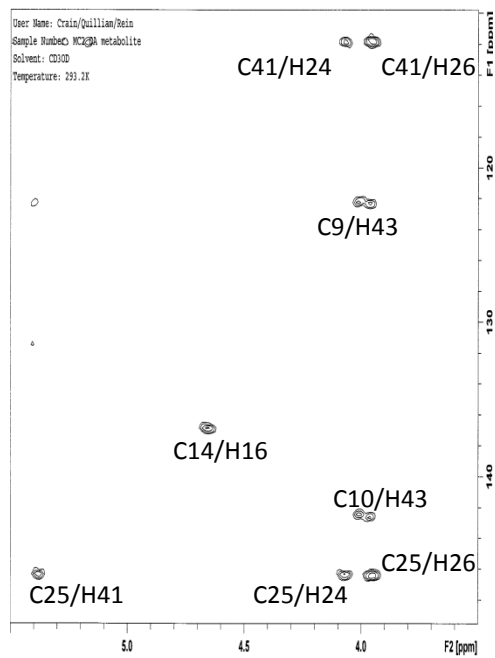

S5. HMBC of metabolite 1 (left) and 2 (right) from 110-150 ppm of  $^{13}\text{C}$  NMR and 3.5-5.5 ppm of  $^1\text{H}$  NMR

| Unit  | Metabolite 1                      |            |                                     |                                  | Metabolite 2 |            |
|-------|-----------------------------------|------------|-------------------------------------|----------------------------------|--------------|------------|
|       | $\delta_H$ (J in Hz) <sup>a</sup> | $\delta_C$ | <sup>1</sup> H- <sup>1</sup> H COSY | TOCSY <sup>b</sup>               | $\delta_H$   | $\delta_C$ |
| 1     | -                                 | 181.07     |                                     |                                  | -            | 181.88     |
| 2     | -                                 | 76.04      |                                     |                                  | -            | 76.66      |
| 3a/b  | 1.63/2.06                         | 46.19      | 4                                   | 4, 5a/b                          | 1.63/1.97    | 46.22      |
| 4     | 4.09                              | 69.20      | 3a/b, 5b                            | 3a/b, 5, 44                      | 4.11         | 69.03      |
| 5     | 1.29/1.80                         | 33.92      | 4, 6a/b                             | 3a/b, 6a/b                       | 1.32/1.80    | 33.15      |
| 6     | 1.65/1.97                         | 27.81      | 7, 5a/b                             | 5a/b, 7                          | 1.67/1.97    | 27.91      |
| 7     | 3.37                              | 73.23      | 6a/b                                | 6                                | 3.41         | 73.09      |
| 8     | -                                 | 96.62      |                                     |                                  | -            | 96.83      |
| 9     | 5.28                              | 123.49     | 43                                  | 11a/b, 12, 43                    | 5.52         | 122.90     |
| 10    | -                                 | 138.81     |                                     |                                  | -            | 137.41     |
| 11    | 1.85/1.97                         | 33.98      | 12                                  | 9, 12, 13, 14, 15, 16,           | 1.97         | 29.41      |
| 12    | 3.80                              | 71.81      | 11a/b, 13                           | 9, 11a/b, 13, 14, 15, 16, 42, 43 | 3.81         | 71.79      |
| 13    | 2.37                              | 43.29      | 12, 14, 42                          | 11a/b, 12, 14, 15, 16, 17, 42    | 2.36         | 43.16      |
| 14    | 5.91                              | 137.68     | 15, 13                              | 11a/b, 12, 13, 15, 16, 18, 42    | 5.93         | 137.52     |
| 15    | 5.50                              | 132.12     | 14, 16                              | 11a/b, 12, 13, 14, 16, 18, 42    | 5.51         | 132.00     |
| 16    | 4.65                              | 79.58      | 15, 17a/b                           | 11, 12, 13, 14, 15, 18           | 4.66         | 80.46      |
| 17    | 1.59/2.19                         | 31.42      | 16, 18a/b                           | 13, 18                           | 2.19/1.60    | 31.36      |
| 18    | 1.86/2.21                         | 37.10      | 17a/b                               | 14, 15, 16, 17a/b,               | 2.20         | 37.35      |
| 19    | -                                 | 106.14     |                                     |                                  | -            | 106.87     |
| 20    | 1.85/2.00                         | 38.01      | 21a                                 |                                  | 1.85/2.01    | 37.98      |
| 21    | 1.78/1.89                         | 27.36      | 20, 22                              |                                  | 1.78/1.90    | 27.47      |
| 22    | 3.64                              | 71.38      | 21a/b, 23                           | 24, 41                           | 3.64         | 71.22      |
| 23    | 3.41                              | 78.11      | 22, 24                              | 24, 41                           | 3.41         | 77.94      |
| 24    | 4.07                              | 72.01      | 23, 41a                             | 22, 23, 41                       | 4.07         | 71.96      |
| 25    | -                                 | 146.28     |                                     |                                  | -            | 146.87     |
| 26    | 3.95                              | 85.40      | 27                                  | 27, 28a/b, 29, 30, 40            | 3.95         | 86.19      |
| 27    | 4.08                              | 66.11      | 26, 28b                             | 26, 28a/b, 29, 30, 31, 40, 41    | 4.10         | 65.99      |
| 28    | 0.93/1.36                         | 36.55      | 27, 29                              | 26, 27, 29, 30                   | 0.95/1.37    | 36.56      |
| 29    | 1.86                              | 32.16      | 30, 40, 28a                         | 26, 27, 28, 30, 31, 39           | 1.88         | 32.15      |
| 30    | 3.23                              | 76.86      | 29, 31                              | 26, 27, 28, 29, 31, 33, 39, 40   | 3.26         | 76.65      |
| 31    | 1.82                              | 28.64      | 39, 32a/b                           | 27, 29, 30, 39                   | 1.82         | 28.60      |
| 32    | 1.42/2.01                         | 27.33      | 31, 33                              | 39                               | 1.39/1.99    | 27.32      |
| 33    | 1.39                              | 30.95      | 32                                  | 30, 39                           | 1.29         | 30.56      |
| 34    | -                                 | 97.88      |                                     |                                  | -            | 97.29      |
| 35a/b | 1.25/1.97                         | 46.18      | 36                                  | 36, 37a/b, 38                    | 1.43/1.62    | 36.85      |
| 36    | 4.02                              | 64.91      | 35a,b; 37a,b                        | 35a/b, 37a/b, 38                 | 1.55/1.89    | 19.59      |
| 37a/b | 1.43/1.84                         | 35.99      | 36, 38                              | 35a/b, 36, 38                    | 1.52         | 26.33      |
| 38    | 3.64                              | 59.70      | 37a,b                               | 35a, 36, 37a/b                   | 3.52/3.71    | 61.20      |
| 39    | 0.94                              | 10.98      | 31                                  | 29, 30, 31, 32, 33               | 0.93         | 10.89      |
| 40    | 0.99                              | 16.45      | 29                                  | 26, 27, 30                       | 1.06         | 16.47      |
| 41    | 5.06/5.37                         | 112.60     | 24                                  | 22, 23, 24, 27, 41               | 5.06/5.38    | 112.47     |
| 42    | 1.08                              | 16.80      | 13                                  | 12, 13, 14, 15                   | 1.10         | 16.83      |
| 43    | 1.74                              | 23.04      | 9                                   | 9, 12                            | 3.99         | 65.65      |
| 44    | 1.32                              | 27.94      |                                     | 4                                | 1.32         | 27.65      |

S6. Table of <sup>1</sup>H and <sup>13</sup>C chemical shifts for metabolites 1 and 2 and COSY and TOCSY correlations for metabolite 1.

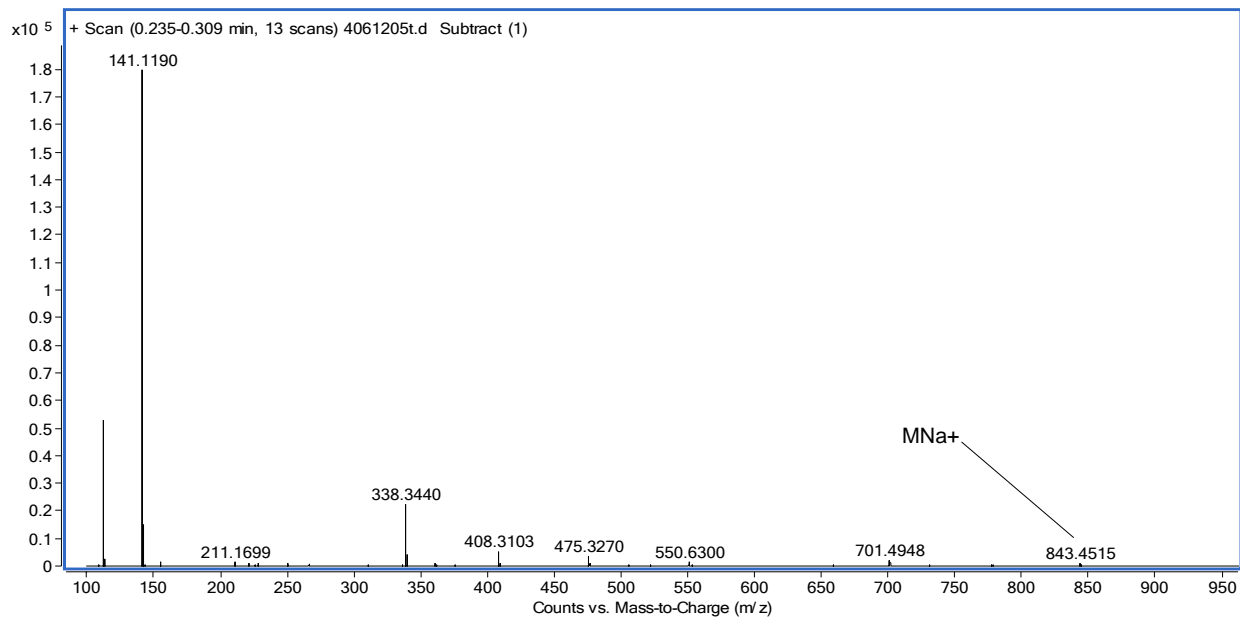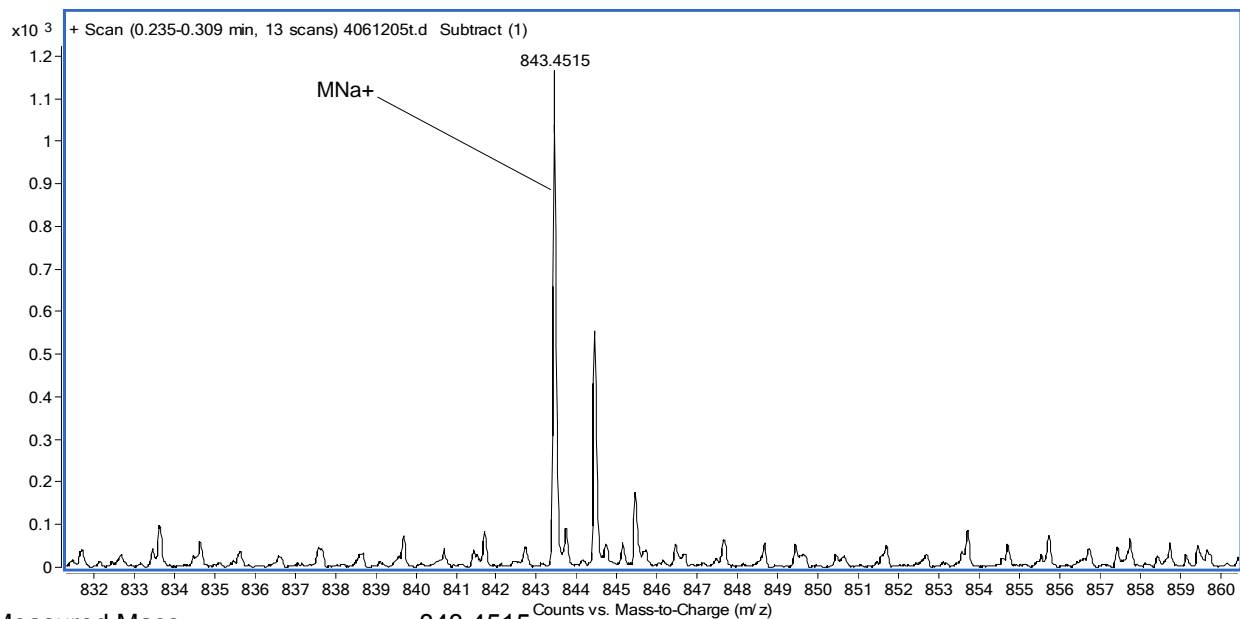

Measured Mass

843.4515

| <u>Element</u> | <u>Low Limit</u> | <u>High Limit</u> |
|----------------|------------------|-------------------|
| C              | 39               | 49                |
| H              | 60               | 80                |
| O              | 12               | 16                |
| Na             | 0                | 1                 |

| <u>Formula</u>                                     | <u>Calculated Mass</u> | <u>mDaError</u> | <u>ppmError</u> | <u>RDB</u> |
|----------------------------------------------------|------------------------|-----------------|-----------------|------------|
| C <sub>46</sub> H <sub>67</sub> O <sub>14</sub>    | 843.4525               | -1.0            | -1.2            | 13.5       |
| C <sub>44</sub> H <sub>68</sub> O <sub>14</sub> Na | 843.4501               | 1.4             | 1.6             | 10.5       |

S7. HRESIMS of metabolite 1



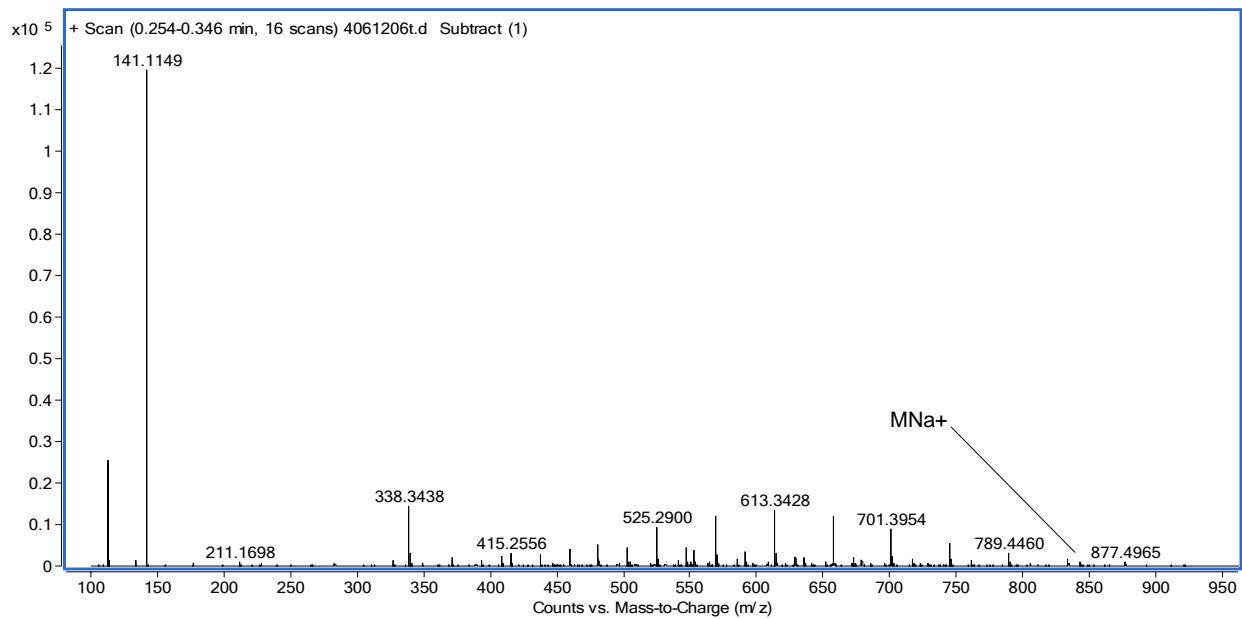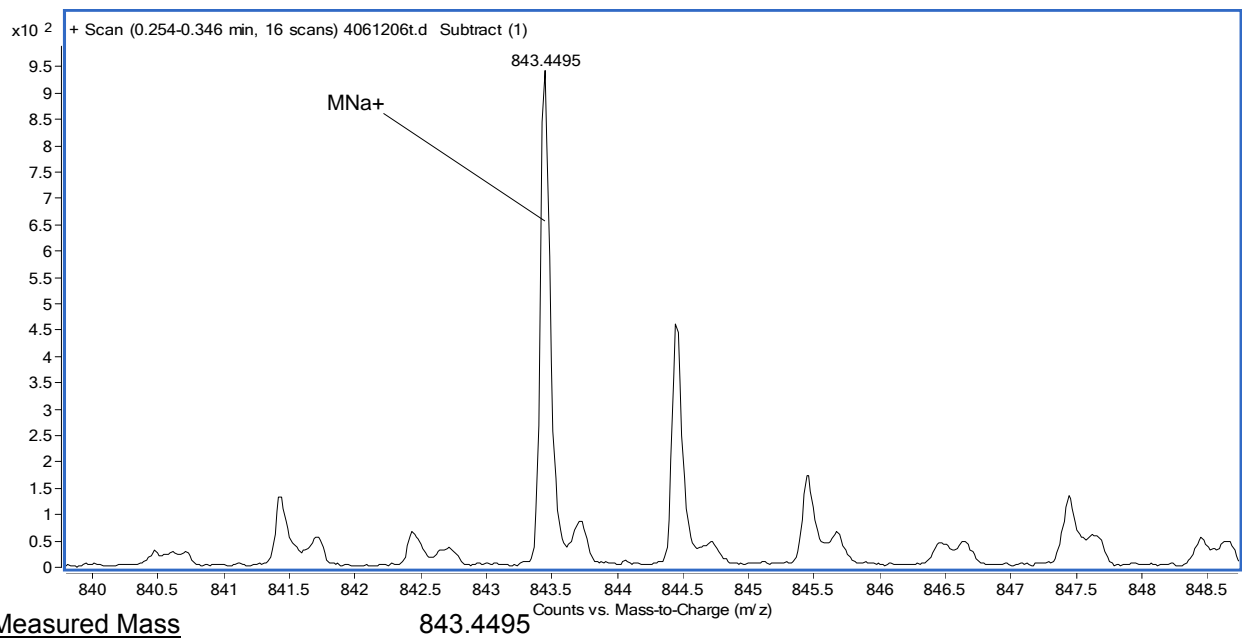

Measured Mass

843.4495

| <u>Element</u> | <u>Low Limit</u> | <u>High Limit</u> |
|----------------|------------------|-------------------|
| C              | 39               | 49                |
| H              | 60               | 80                |
| O              | 12               | 16                |
| Na             | 0                | 1                 |

| <u>Formula</u>                                     | <u>Calculated Mass</u> | <u>mDaError</u> | <u>ppmError</u> | <u>RDB</u> |
|----------------------------------------------------|------------------------|-----------------|-----------------|------------|
| C <sub>44</sub> H <sub>68</sub> O <sub>14</sub> Na | 843.4501               | -0.6            | -0.7            | 10.5       |
| C <sub>46</sub> H <sub>67</sub> O <sub>14</sub>    | 843.4525               | -3.0            | -3.6            | 13.5       |

S8. HRESIMS of metabolite 2

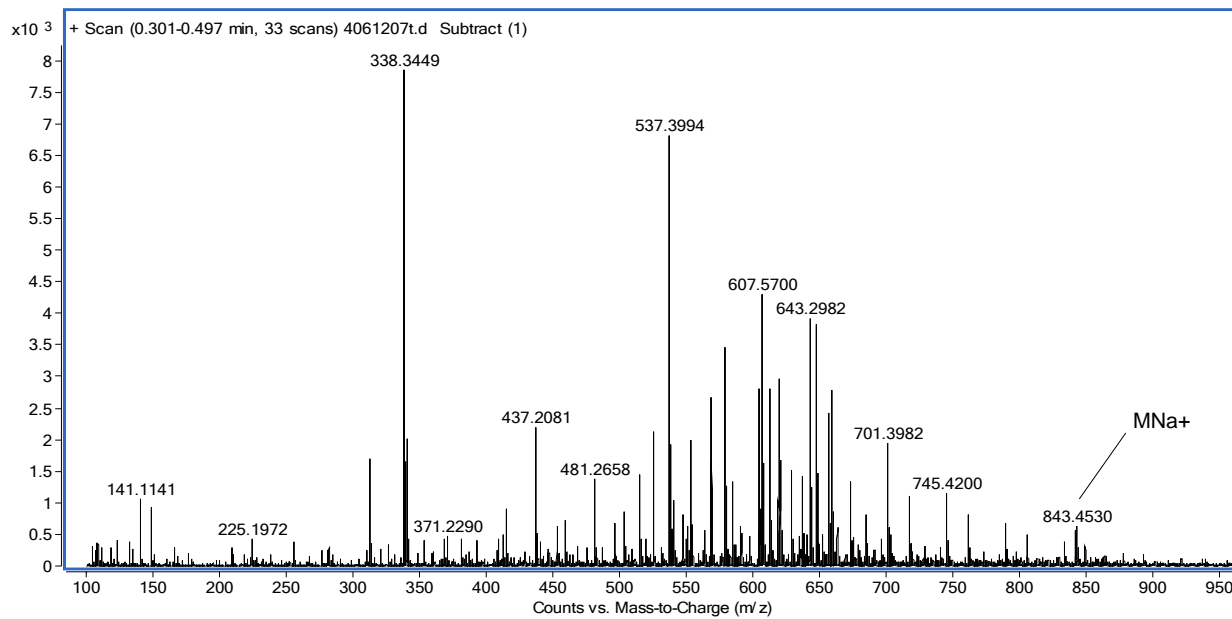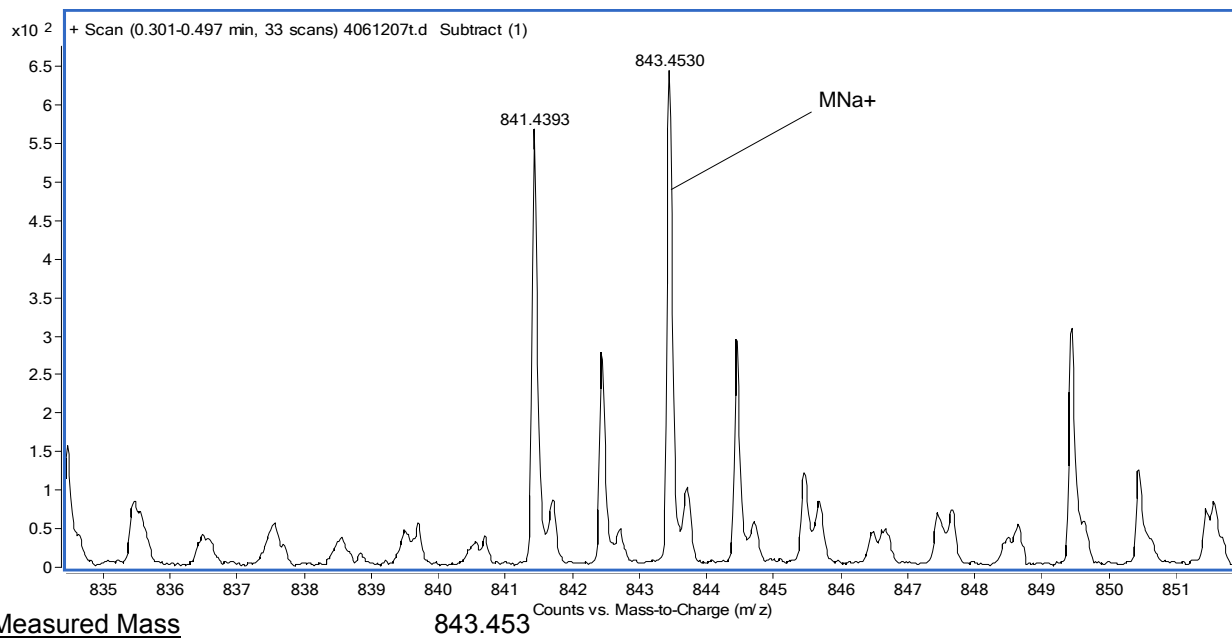

Measured Mass

843.453

| <u>Element</u> | <u>Low Limit</u> | <u>High Limit</u> |
|----------------|------------------|-------------------|
| C              | 39               | 49                |
| H              | 60               | 80                |
| O              | 12               | 16                |
| Na             | 0                | 1                 |

| <u>Formula</u>                                     | <u>Calculated Mass</u> | <u>mDaError</u> | <u>ppmError</u> | <u>RDB</u> |
|----------------------------------------------------|------------------------|-----------------|-----------------|------------|
| C <sub>46</sub> H <sub>67</sub> O <sub>14</sub>    | 843.4525               | 0.5             | 0.6             | 13.5       |
| C <sub>44</sub> H <sub>68</sub> O <sub>14</sub> Na | 843.4501               | 2.9             | 3.4             | 10.5       |

S9. HRESIMS of metabolite 4
